# Supplementary material for: Characteristics of diarrheagenic Escherichia coli among children under 5 years of age with acute diarrhea: a hospital based study
Source: BMC Infect Dis. 2018 Feb 1;18:63. doi: 10.1186/s12879-017-2936-1 (PMC5796495; doi:10.1186/s12879-017-2936-1)
Supplement: Supplementary file 1 — Clinical information of DEC infected children. (XLSX 27 kb) [file 12879_2017_2936_MOESM1_ESM.xlsx]

## Sheet: Data of DEC infected children
Number	Pathotypes	Sex	Age（months）					Enrolled season				Main clinical symptoms
			0-11	12-23	24-35	36-47	48-59	Spring	Summer	Autumn	Winter	Nausea	Vomiting	Abdominal pain	Fever( >37.2℃)	Bloody diarrhea
1	aEPEC	Femal		1						1			1
2	aEPEC	Male	1							1					1
3	aEPEC	Femal		1					1				1
4	aEPEC	Femal	1								1				1
5	aEPEC	Male		1							1				1
6	aEPEC	Male			1					1			1
7	aEPEC	Male			1					1					1
8	aEPEC	Male				1				1					1
9	aEPEC	Male				1				1		1
10	aEPEC	Male	1						1				1
11	aEPEC	Male					1				1		1
12	aEPEC	Male	1							1				1
13	aEPEC	Femal		1					1						1
14	aEPEC	Femal		1					1				1
15	aEPEC	Male				1			1						1
16	aEPEC	Femal		1				1						1
17	aEPEC	Femal	1							1				1
18	aEPEC	Femal	1						1				1
19	aEPEC	Male		1					1						1
20	aEPEC	Male	1							1				1
21	aEPEC	Femal		1					1				1
22	tEPEC	Femal			1				1						1
23	tEPEC	Male	1						1						1
24	tEPEC	Male				1				1			1
25	tEPEC	Femal			1				1						1
26	tEPEC	Male	1					1					1
27	tEPEC	Femal	1						1						1
28	EAEC	Male	1							1			1
29	EAEC	Femal	1							1					1
30	EAEC	Male			1					1			1
31	EAEC	Male		1				1							1
32	EAEC	Femal	1						1				1
33	EAEC	Femal	1					1							1
34	EAEC	Male		1						1			1
35	EAEC	Male	1						1						1
36	EAEC	Femal				1				1					1
37	EAEC	Male	1						1						1
38	EAEC	Femal	1						1						1
39	ETEC	Male	1							1					1
40	ETEC	Male				1					1				1
41	ETEC	Male					1			1				1
42	ETEC	Femal	1					1				1
43	ETEC	Femal	1							1					1
44	ETEC	Femal		1				1							1
45	ETEC	Male	1					1						1
46	ETEC	Male	1							1					1
47	EIEC	Male	1					1							1	1
48	EIEC	Femal	1								1
49	STEC	Femal	1						1						1	1
50	STEC	Male	1						1						1	1
51	aEPEC+ETEC	Male	1							1
52	aEPEC+ETEC	Male	1							1					1
53	aEPEC+ETEC	Femal	1								1
54	tEPEC+EAEC	Male		1							1					1
			29	12	5	6	2	8	18	21	7	2	14	6	28	4
